# Supplementary material for: Green and low-cost synthesis of PANI–TiO2 nanocomposite mesoporous films for photoelectrochemical water splitting
Source: Royal Society of Chemistry journal article supplement (doi:10.1039/c5ra06734k), 2015-01-01
Supplement: c5ra06734k1.pdf [file c5ra06734k1.pdf]

# Green and low-cost synthesis of PANI-TiO<sub>2</sub> nanocomposite mesoporous films for photoelectrochemical water splitting

D. Hidalgo <sup>a,b</sup>, S. Bocchini <sup>a</sup>, M. Fontana <sup>a,b</sup>, G. Saracco <sup>b</sup>, S. Hernández <sup>a,b,\*</sup>

<sup>a</sup> Center for Space Human Robotics, Istituto Italiano di Tecnologia, IIT@POLITO, Torino, Italy

<sup>b</sup> Applied Science and Technology Department, DISAT, Politecnico di Torino, Torino, Italy

\* e-mail: [simelys.hernandez@polito.it](mailto:simelys.hernandez@polito.it) / Tel. +39 011.0904774

## Supporting Information

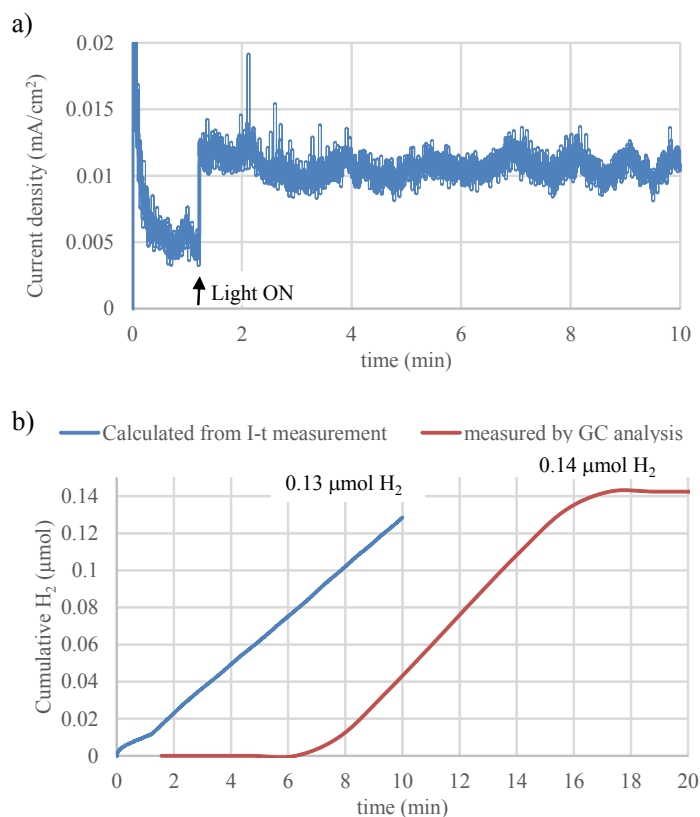

**Figure S1.** a) Photocurrent vs. time of PANI/TiO<sub>2</sub> film at an applied potential of 0.6 V vs. Ag/AgCl for 10 min, under continuous stirring and stripping of the products by an Ar flow of 25 Nml/min. b) Cumulative H<sub>2</sub> produced both calculated from the *I-t* curve reported in a) (blue line) and measured by micro-GC analysis (red curve) with an error of about 10% due to the low concentration of the H<sub>2</sub> measured values (about 10 to 15 ppm of H<sub>2</sub>). It was not possible to measure the O<sub>2</sub> evolved due to limitations on the sensibility of the instrument and to the difficulty to remove all the O<sub>2</sub> present in the air from the electrochemical cell during the measurements.
